# Supplementary material
Source: Springer Nature journal article supplement (https://www.springermedizin.de/resource/supplementary/12891_2008_477_MOESM3_ESM.pdf/9511524)

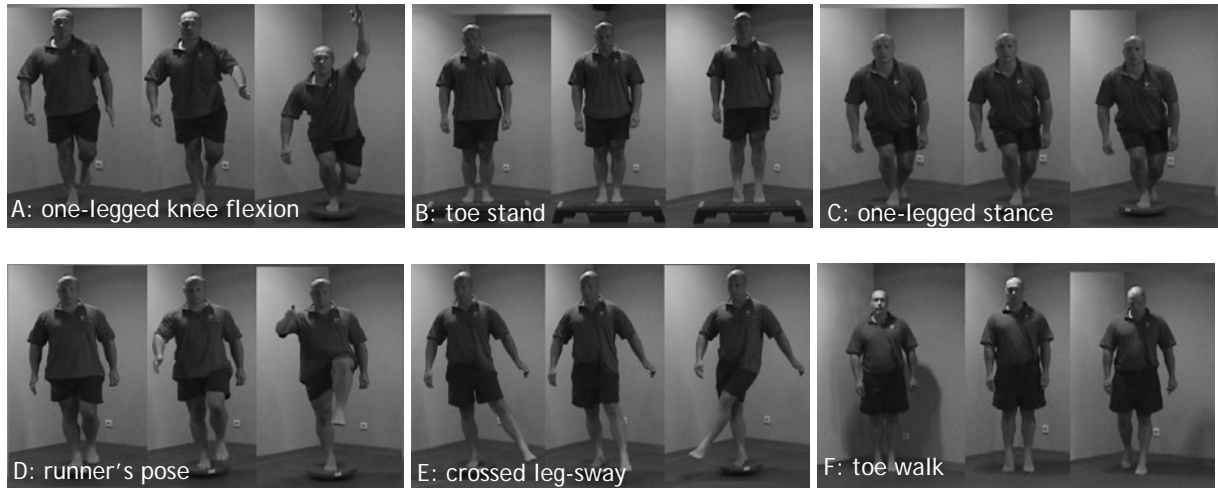

Figure 2: Basic exercises of the 2BFit proprioceptive balance board training programme.

Supplement: MOESM3 [file 9511524]
